# Supplementary material
Source: HighWire-hosted journal article supplement (http://molpharm.aspetjournals.org/highwire/filestream/76786/field_highwire_adjunct_files/12/Supplementary_Table_S9.pdf)
Supplement: Supplementary_Table_S9.pdf [file Supplementary_Table_S9.pdf]

## Identification of Survival Genes in Human Glioblastoma Cells Using siRNA Screening

Nikhil G Thaker, Fang Zhang, Peter R. McDonald, Tong Ying Shun, Michael D Lewen, Ian F. Pollack, and John S. Lazo

Molecular Pharmacology

Supplementary Table S9

Functional classification of survival genes.

| <b>Cellular Function</b>                | <b>Genes</b>                                                                                                              |
|-----------------------------------------|---------------------------------------------------------------------------------------------------------------------------|
| Dermatological Diseases and Conditions  | POLR2A,PSMA1,PSMA2,PSMA3,PSMA5, PSMC3, PSMC5,GPX2,TLR2,PRKCD,ITGB3                                                        |
| Infectious Disease                      | POLR2A,PSMA1,PSMA2,PSMA3,PSMA5, PSMC3, PSMC5,GRIN1,ITGB3,RRM1                                                             |
| Embryonic Development                   | POLR2A,PSMA1,PSMA2,PSMA3,PSMA5, PSMC3, PSMC5,POMT1,TLR2,RRM1                                                              |
| Cellular Compromise                     | POLR2A,PSMA1,PSMA2,PSMA3,PSMA5, PSMC3, PSMC5,CLCN3,PRKCD,ITGB3                                                            |
| Cell-To-Cell Signaling and Interaction  | CHN1,ITGB3,PRKCD,TL2,GRIN1                                                                                                |
| Cellular Function and Maintenance       | CHN1,ITGB3,PRKCD,TLR2,GRIN1                                                                                               |
| Inflammatory Response                   | CHN1,ITGB3,PRKCD,TLR2,SLC7A2                                                                                              |
| Nervous System Development and Function | GRIN1,ITGB3,CLCN3,GALNS,TLR2,GALNS, CHN1                                                                                  |
| Cell Morphology                         | TLR2,ITGB3,PRKCD,ARHGEF11,CHN1, GALNS, AKT3                                                                               |
| Gastrointestinal Disease                | ITGB3,TLR2,AKT3,BUB1B,DDX39,GPX2, PSMB14,RRM1,PRKCD,SPINK1,RRM1, GUSB, KIF20B                                             |
| Cancer                                  | AKT3,GRIN1,ITGB3,RRM1,PSMA2,BUB1B, CLCN3,POLR2A,DDX39,GPX2,PSMD14, CYP1B1,KIF20B,PRKCD,SMS,PSMA6, RAN, ARHGEF11,CHN1,TLR2 |
